# Supplementary material for: Decreased cloud cover partially offsets the cooling effects of surface albedo change due to deforestation
Source: Research Square preprint supplement (doi:10.21203/rs.3.rs-4019501/v1), 2024-07-23
Supplement: Supplementary file 1 [file 85e301c66b745bda85956332.pdf]

Supplementary Information for

**Decreased cloud cover partially offsets the cooling effects of surface  
albedo change due to deforestation**

Hao Luo<sup>1,2\*</sup>, Johannes Quaas<sup>2,3</sup>, Yong Han<sup>1,4\*</sup>

<sup>1</sup>Advanced Science & Technology of Space and Atmospheric Physics Group (ASAG),  
School of Atmospheric Sciences, Sun Yat-sen University, 519082 Zhuhai, China

<sup>2</sup>Leipzig Institute for Meteorology, Leipzig University, 04103 Leipzig, Germany

<sup>3</sup>German Centre for Integrative Biodiversity Research (iDiv) Halle-Jena-Leipzig,  
04103 Leipzig, Germany

<sup>4</sup>Key Laboratory of Tropical Atmosphere-Ocean System (Sun Yat-sen University),  
Ministry of Education, 519082 Zhuhai, China

\*Corresponding author(s). Email(s): luoh93@mail2.sysu.edu.cn (Hao Luo);  
hany66@mail.sysu.edu.cn (Yong Han)

15 **Supplementary Table 1. List of CMIP6 models used in this study.** All of the  
 16 simulations have the variant label ‘r1i1p1f1’.

| No. | Model        | Grid    | Level | References                       |
|-----|--------------|---------|-------|----------------------------------|
| 1   | BCC-CSM2-MR  | 320×160 | 46    | Wu, et al. <sup>1</sup>          |
| 2   | CESM2        | 288×192 | 32    | Danabasoglu, et al. <sup>2</sup> |
| 3   | CMCC-ESM2    | 288×192 | 30    | Lovato, et al. <sup>3</sup>      |
| 4   | IPSL-CM6A-LR | 144×143 | 79    | Boucher, et al. <sup>4</sup>     |
| 5   | NorESM2-LM   | 144×96  | 32    | Seland, et al. <sup>5</sup>      |

17

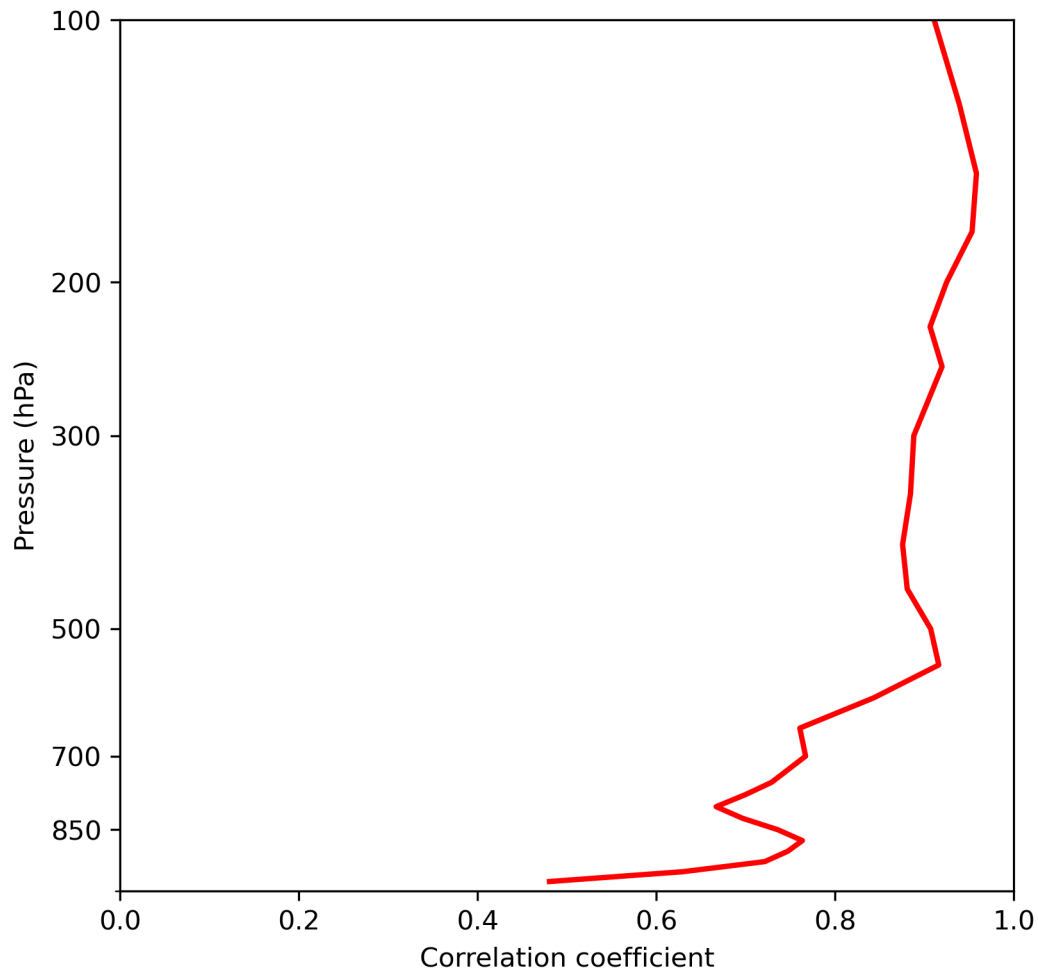

18

19 **Supplementary Figure 1. Correlation coefficient for the horizontal spatial**  
 20 **variability of the 4-year (2007–2010) average cloud profiles from ERA5 and**  
 21 **CALIPSO-CloudSat retrievals. The ERA5 cloud profiles are bilinearly gridded**  
 22 **spatially into  $2^\circ \times 2^\circ$  to align with the CALIPSO-CloudSat data.**

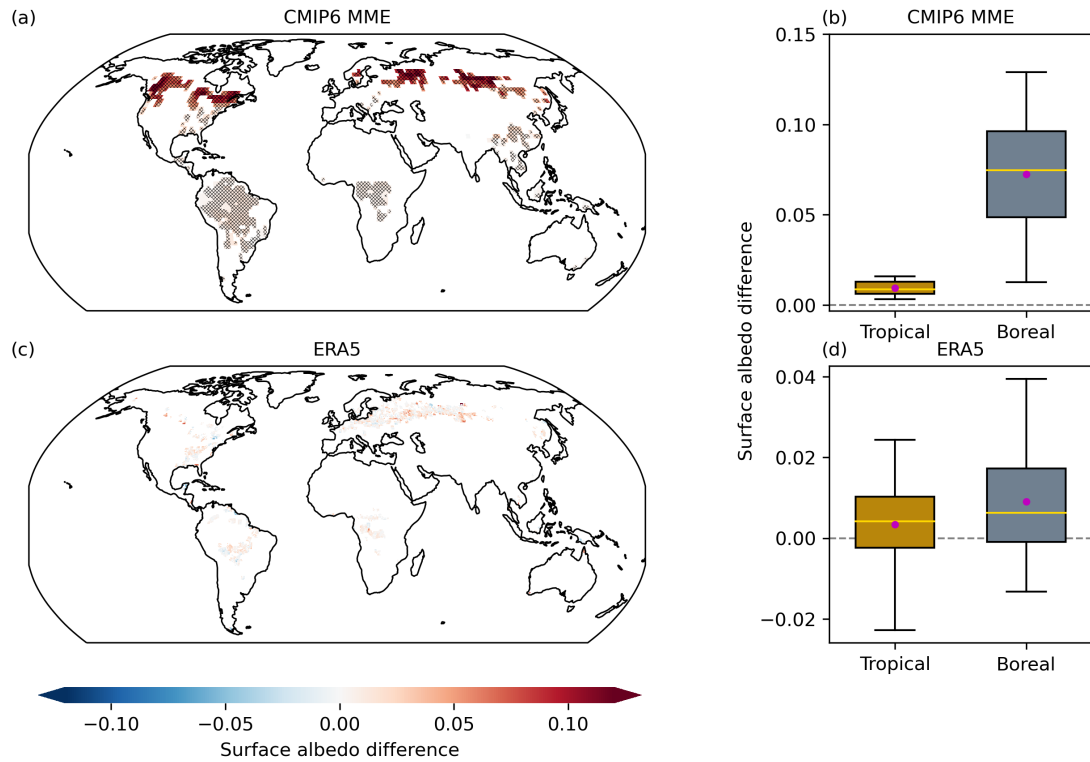

23

24 **Supplementary Figure 2. Changes in surface albedo due to deforestation.** (a)

25 Global pattern of the surface albedo difference between the deforest-glob and

26 piControl simulations (deforest-glob minus piControl). The diagonal grids indicate

27 four or more of the five models showing the same symbol. (b) Box plots of the

28 CMIP6 surface albedo differences between the deforest-glob and piControl

29 simulations over both tropical and boreal areas. (c) ERA5 surface albedo variations

30 due to deforestation using the space-for-time substitution (see Methods). (d) Box plots

31 of the ERA5 surface albedo variations due to deforestation. The data in (a-b) is the

32 ensemble mean of the local effect extracted from CMIP6 model simulations (see

33 Methods). Boxes in (b and d) show the 25th to 75th percentiles of the data, whiskers

34 display the 5th to 95th percentiles, horizontal yellow lines in the boxes represent the

35 median values, and red dots are the mean values.

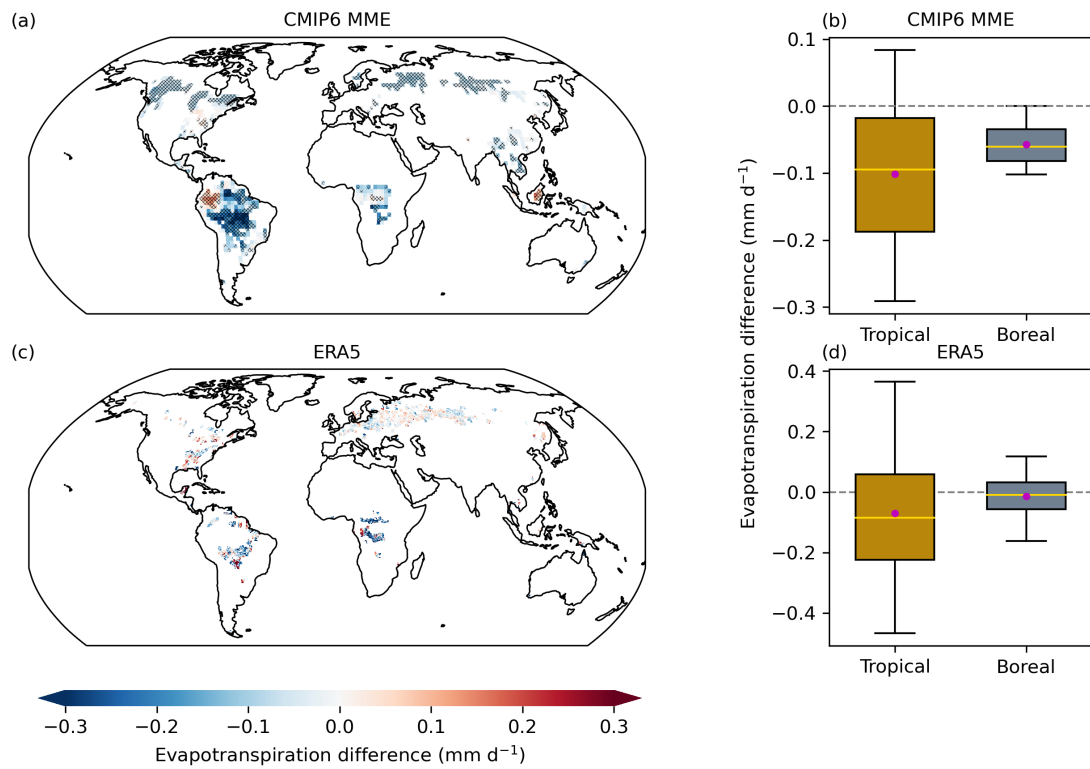

36

37 **Supplementary Figure 3. Changes in evapotranspiration due to deforestation.**

38 Same as Supplementary Fig. 2 but for evapotranspiration ( $\text{mm day}^{-1}$ ).

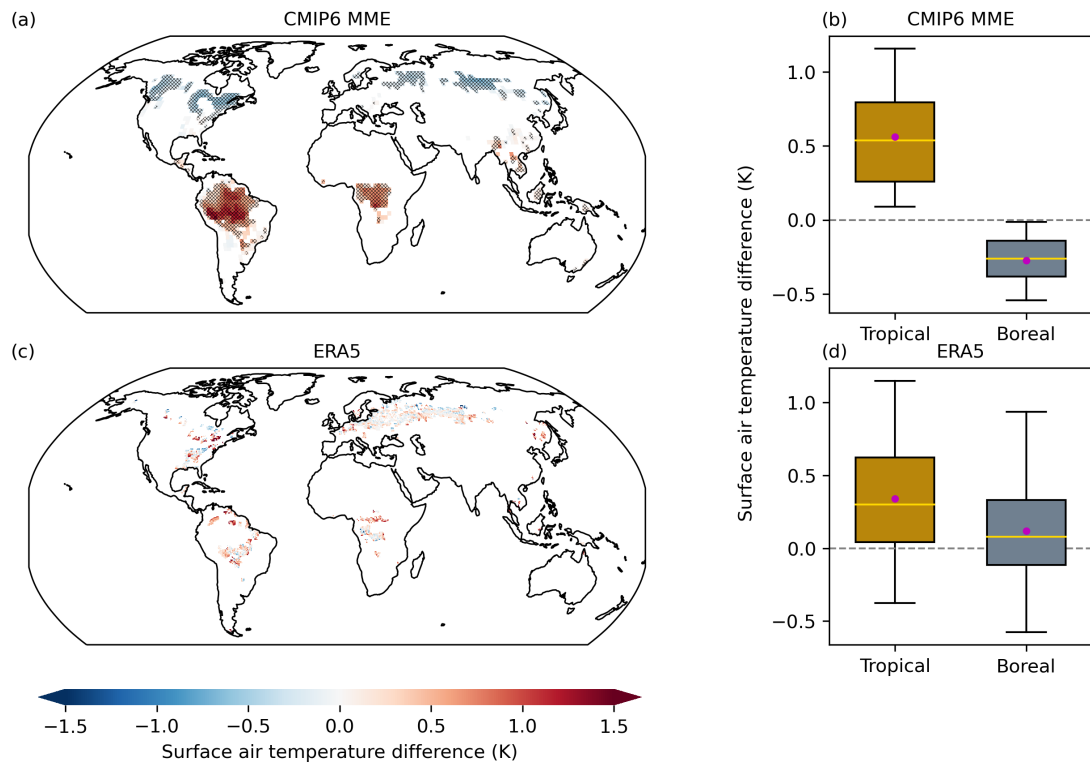

39

40 **Supplementary Figure 4. Changes in surface air temperature due to**  
 41 **deforestation.** Same as Supplementary Fig. 2 but for surface air temperature.

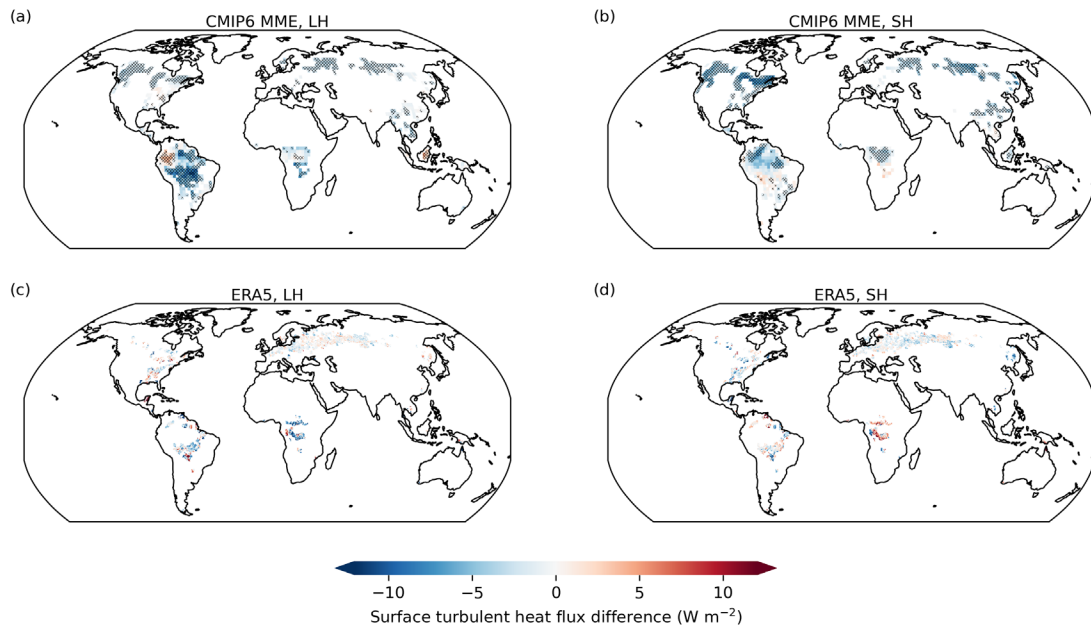

42

43 **Supplementary Figure 5. Changes in surface turbulent heat flux due to**  
 44 **deforestation.** (a and b) Same as Supplementary Fig. 2 (a), but for latent heat flux  
 45 (LH) and sensible heat flux (SH), respectively. (c and d) Same as Supplementary Fig.  
 46 2 (c), but for LH and SH, respectively.

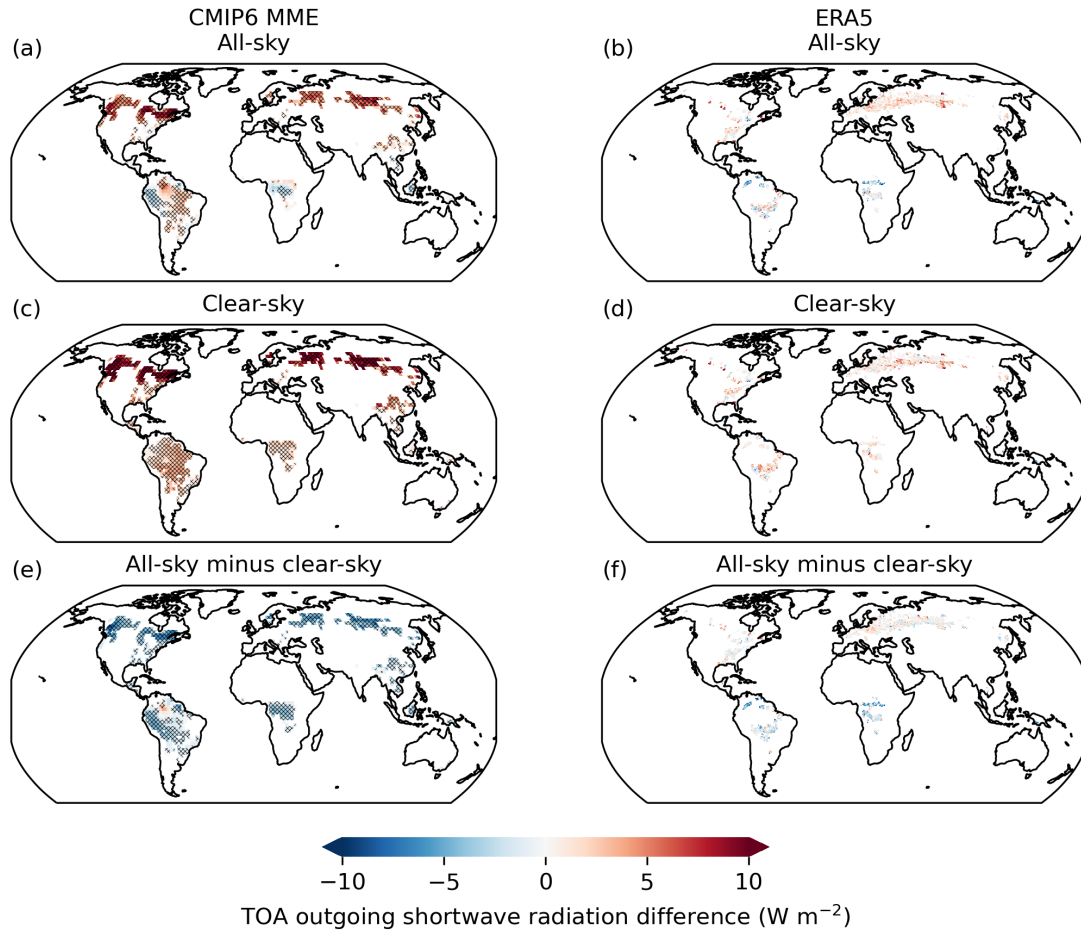

47

48 **Supplementary Figure 6. Changes in outgoing shortwave radiation at the top of**  
 49 **atmosphere (TOA) due to deforestation.** (a, c, and e) Global pattern of the TOA  
 50 outgoing shortwave radiation difference between the deforest-glob and piControl  
 51 simulations (deforest-glob minus piControl), respectively, under all-sky, clear-sky,  
 52 and all-sky minus clear-sky circumstances. The diagonal grids indicate four or more  
 53 of the five models showing the same symbol. (b, d, and f) ERA5 TOA outgoing  
 54 shortwave radiation variations due to deforestation using the space-for-time  
 55 substitution (see Methods). The CMIP6 data is the ensemble mean of the local effect  
 56 extracted from multi-model simulations (see Methods).

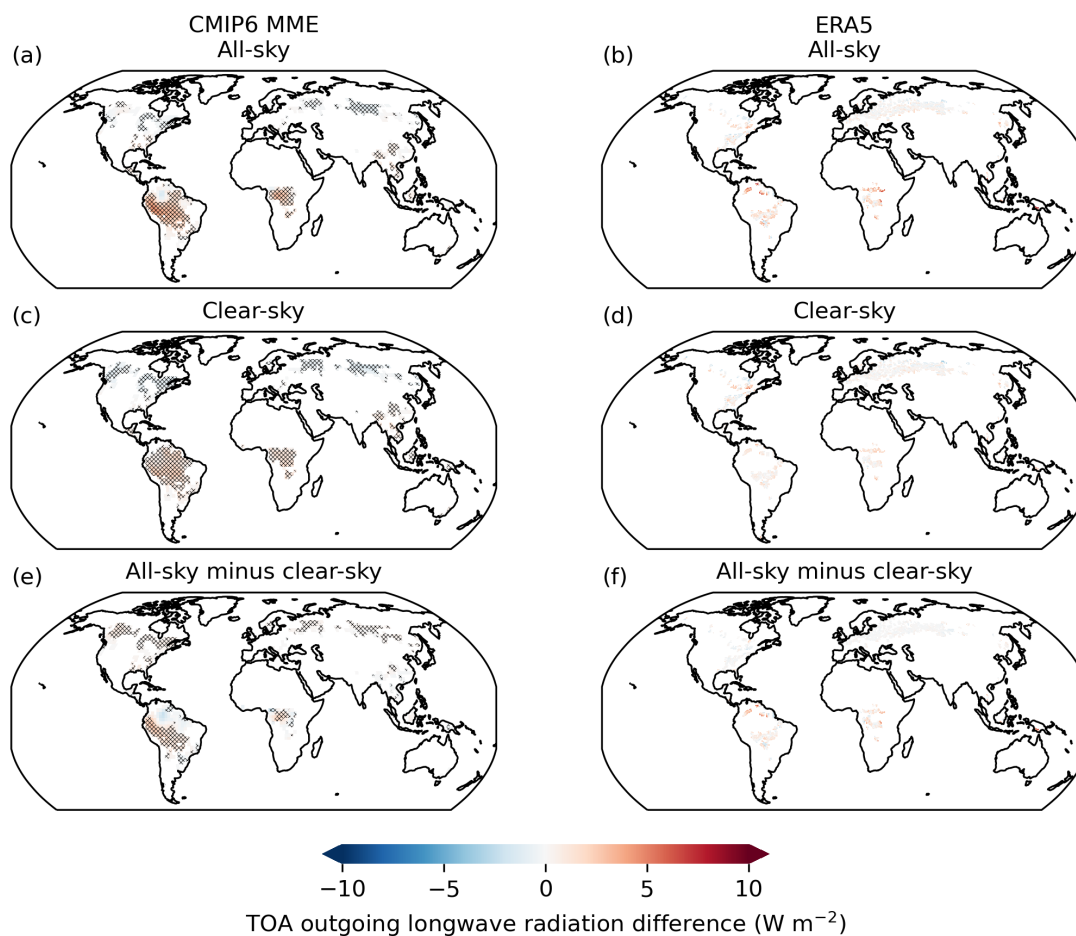

57

58 **Supplementary Figure 7. Changes in outgoing longwave radiation at the top of**  
 59 **atmosphere (TOA) due to deforestation.** Same as Supplementary Fig. 6, but for  
 60 longwave radiation.

61   **Supplementary references**

- 62   1       Wu, T. *et al.* BCC-CSM2-HR: a high-resolution version of the Beijing Climate  
63       Center Climate System Model. *Geosci. Model Dev.* **14**, 2977-3006,  
64       doi:10.5194/gmd-14-2977-2021 (2021).
- 65   2       Danabasoglu, G. *et al.* The Community Earth System Model Version 2  
66       (CESM2). *Journal of Advances in Modeling Earth Systems* **12**,  
67       e2019MS001916, doi:10.1029/2019MS001916 (2020).
- 68   3       Lovato, T. *et al.* CMIP6 Simulations With the CMCC Earth System Model  
69       (CMCC-ESM2). *Journal of Advances in Modeling Earth Systems* **14**,  
70       e2021MS002814, doi:10.1029/2021MS002814 (2022).
- 71   4       Boucher, O. *et al.* Presentation and Evaluation of the IPSL-CM6A-LR Climate  
72       Model. *Journal of Advances in Modeling Earth Systems* **12**, e2019MS002010,  
73       doi:10.1029/2019MS002010 (2020).
- 74   5       Seland, Ø. *et al.* Overview of the Norwegian Earth System Model (NorESM2)  
75       and key climate response of CMIP6 DECK, historical, and scenario  
76       simulations. *Geosci. Model Dev.* **13**, 6165-6200, doi:10.5194/gmd-13-6165-  
77       2020 (2020).

78
